# Supplementary material for: Natural Language Processing for Information Extraction of Gastric Diseases and Its Application in Large-Scale Clinical Research
Source: MDPI journal article supplement (doi:10.3390/jcm11112967), 2022-05-24
Supplement: s1 [file s1]

**Supplementary Table S1.** Summary of dictionary for gastric disease.

| Variables                | Impression                               | Findings                                                                        |
|--------------------------|------------------------------------------|---------------------------------------------------------------------------------|
| Location                 |                                          |                                                                                 |
| Antrum                   | -                                        | antrum, angle, pylorus, pyloric orifice,<br>pyloric sphincter                   |
| Body                     | -                                        | body, high body, mid body, low body                                             |
| Fundus                   | -                                        | fundus, cardia, gastroesophageal junction                                       |
| Chronic gastric          |                                          |                                                                                 |
| Atrophic<br>Gastritis    | atrophic                                 | thin, atrophy, vascularity, hyperemia, nodular,<br>grey, pale, granular, vessel |
| Intestinal<br>Metaplasia | metaplasia                               | nodular, granular grey, white, hyperemia,<br>velvety                            |
| Superficial<br>Gastritis | superficial                              | hyperemia, edema, hemorrhage, erythematous,<br>congestion, punctate             |
| Erosive<br>Gastritis     | erosive, verrucous                       | erosion, verruca, elevation, depression,<br>hyperemia                           |
| Follicular<br>Gastritis  | follicular                               | follicular, granular, nodular, chicken, goose,<br>protrusion                    |
| Other gastric diseases   |                                          |                                                                                 |
| Ulcer                    | ulcer,<br>benign gastric ulcer           | ulcer, depression, yellowish, converge                                          |
| Polyp                    | polyp                                    | polyp, elevation, raised                                                        |
| SMT                      | submucosal tumor,<br>subepithelial tumor | protrude, nodule, submucosal tumor, elevation,<br>subepithelial tumor,          |
| Dysplasia *              | -                                        | tubular adenoma                                                                 |

---

Cancer <sup>†</sup>

-

neuroendocrine tumor, adenocarcinoma,  
carcinoma, lymphoma with malt, maltoma

---

\* Dysplasia includes tubular adenoma with low grade dysplasia. <sup>†</sup> Cancer includes carcinoma, neuroendocrine tumor, maltoma, and lymphoma with malt. SMT: submucosal tumor.
